# Supplementary material
Source: PubMed Central journal article supplement (PMC11027642)
Supplement: 262_2020_2528_MOESM1_ESM.pdf [file 262_2020_2528_MOESM1_ESM.pdf]

## Supplementary materials

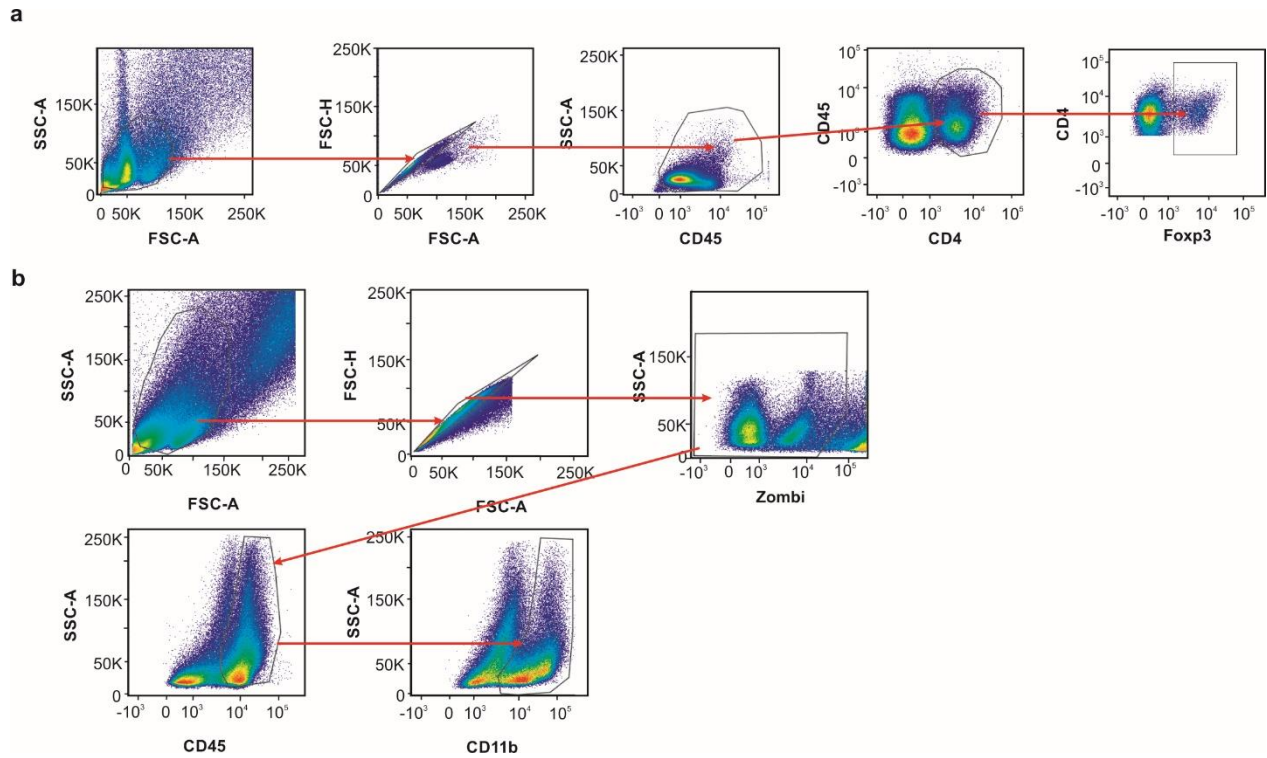

**Supplementary Figure 1. a.** Gating strategy for Treg cells ( $CD45^+CD4^+Foxp3$ ). **b.** Gating strategy for tumor associated immunological  $CD11b^+$  cells.

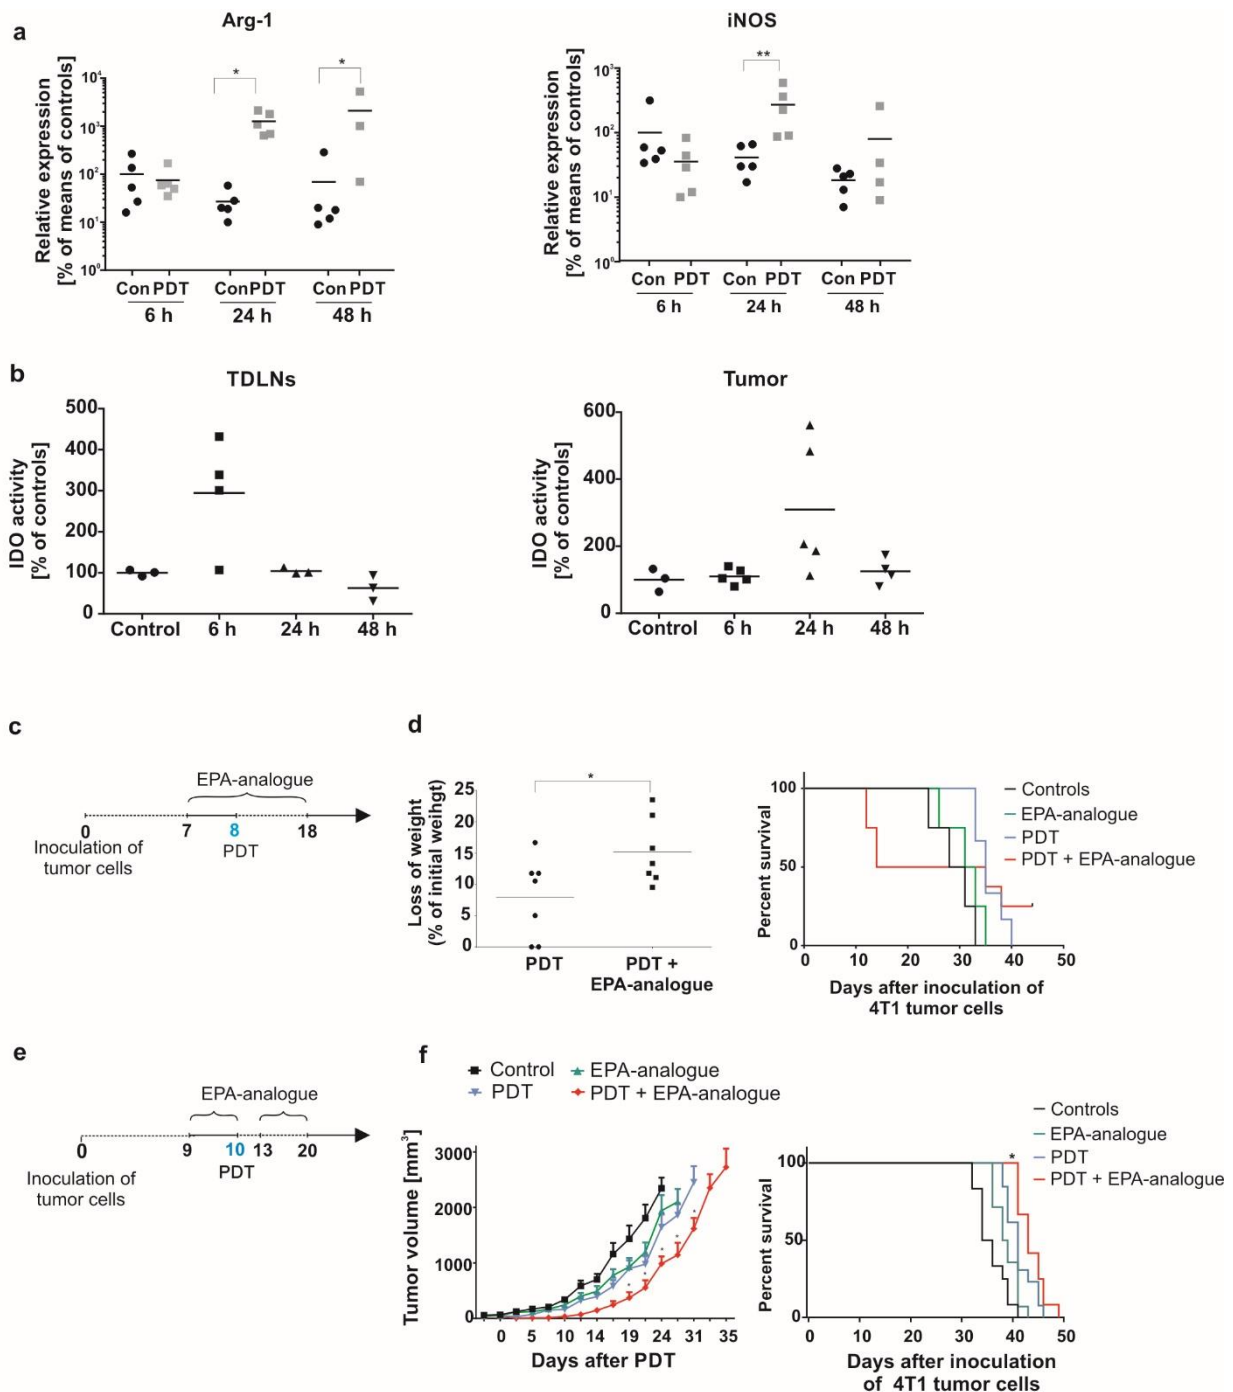

**Supplementary Figure 2. a.** Expression of Arg-1 and iNOS in E0071 tumors. Expression was measured in tumors 6, 24 and 48 h post PDT. mRNA levels were determined using real-time PCR. Data presents % of means of controls in experimental groups, n = 3-6, \*P < 0.05. \*\*P < 0.01 **b.** Activity of IDO enzyme evaluated in TDLNs (left) and 4T1 tumors (right) 6, 24 and 48 h post

PDT. Data presents % of controls in experimental groups, n = 3-5. **c, e.** Detailed experimental scheme. **d.** Left panel refers to weight loss of tumor bearing mice and right panel presents corresponding Kaplan–Meyer survival plots in all experimental groups, n = 6-8, \*P < 0.05. **f.** Left panel shows mean tumour volumes  $\pm$ SEM. Graphs present mean values from two independent repeats. Right panel presents corresponding Kaplan–Meyer survival plots in all experimental groups, n = 12-14, \*P < 0.05
